# Supplementary material for: Nitrogen-doped graphene quantum dots as a support for Ni–Au nanoparticles: efficient electrocatalysts for ethanol and formate fuel cells using hydrogen peroxide as an oxidant
Source: Royal Society of Chemistry journal article supplement (doi:10.1039/d4nj00312h), 2024-01-01
Supplement: d4nj00312h1.pdf [file d4nj00312h1.pdf]

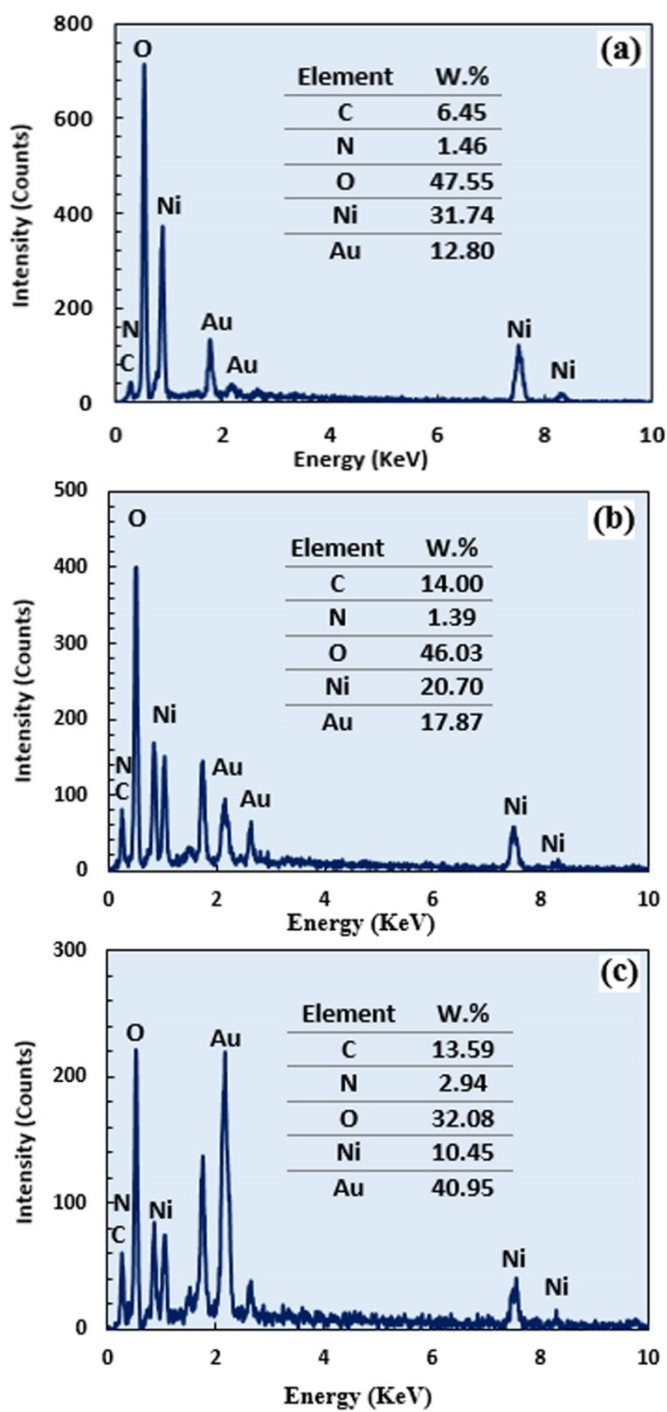

**Figure 1S.** EDX analysis of (a) Ni<sub>3</sub>Au<sub>1</sub>-NGQD (b) Ni<sub>1</sub>Au<sub>1</sub>-NGQD (c) Ni<sub>1</sub>Au<sub>3</sub>-NGQD electrocatalysts.

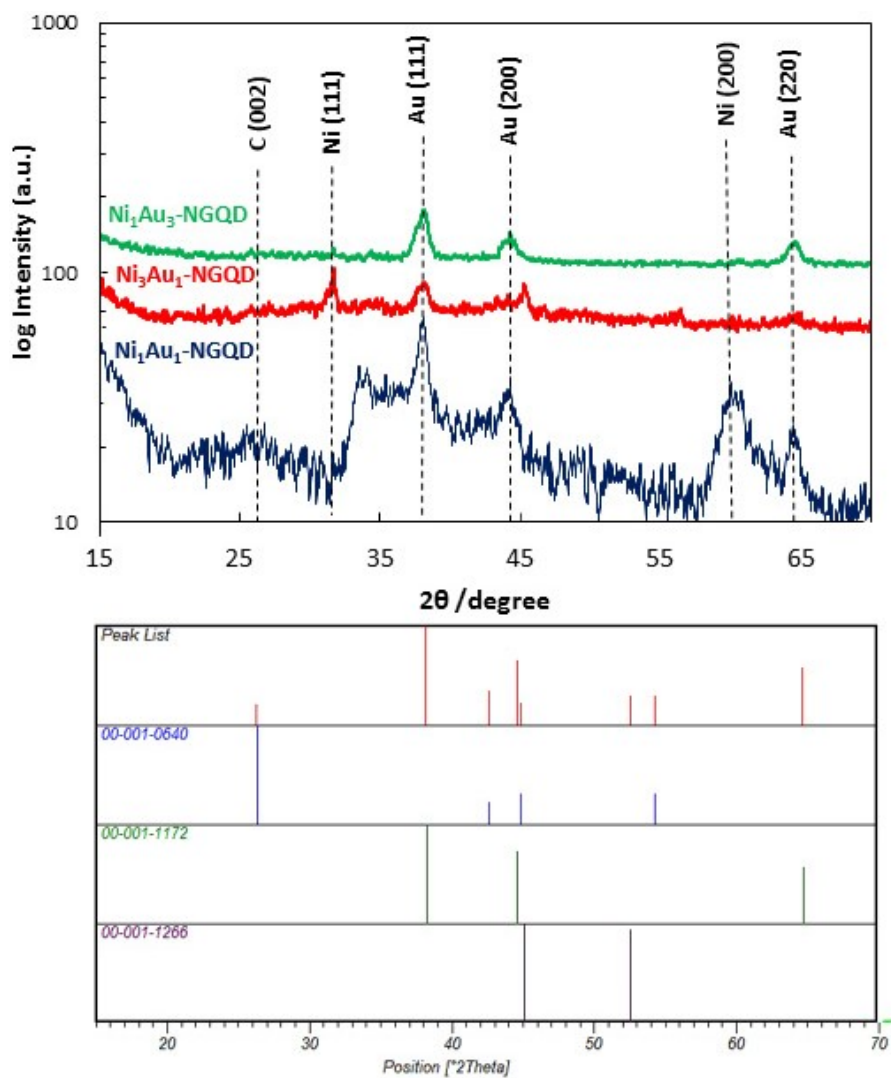

**Figure 2S.** XRD patterns of  $\text{Ni}_1\text{Au}_3\text{-NGQD}$ ,  $\text{Ni}_3\text{Au}_1\text{-NGQD}$  and  $\text{Ni}_1\text{Au}_1\text{-NGQD}$  electrocatalysts.

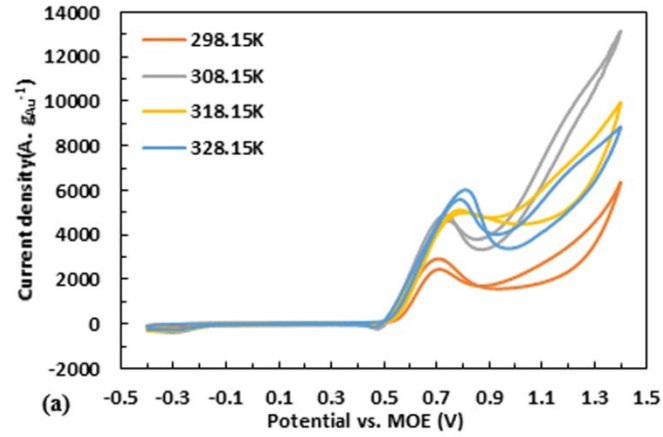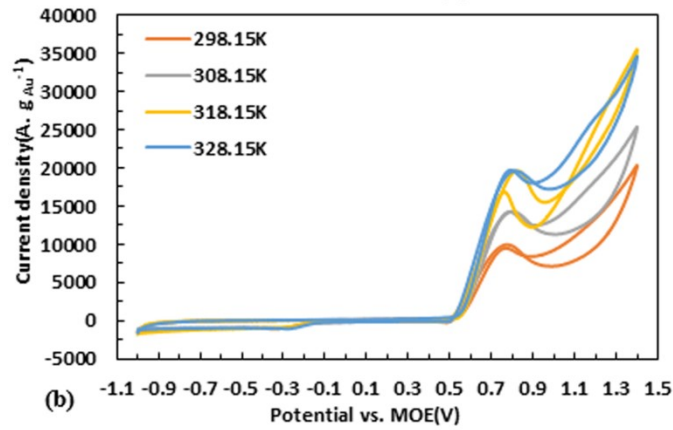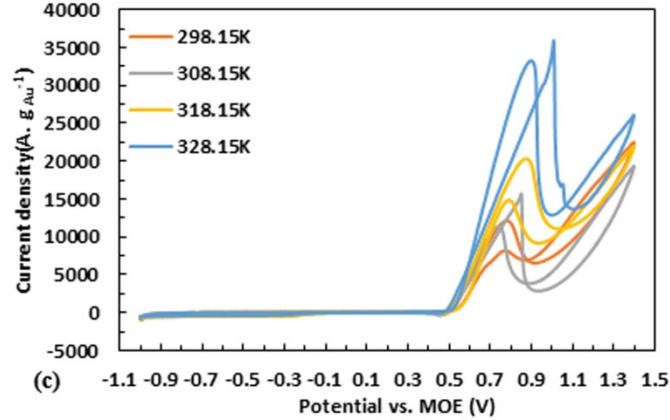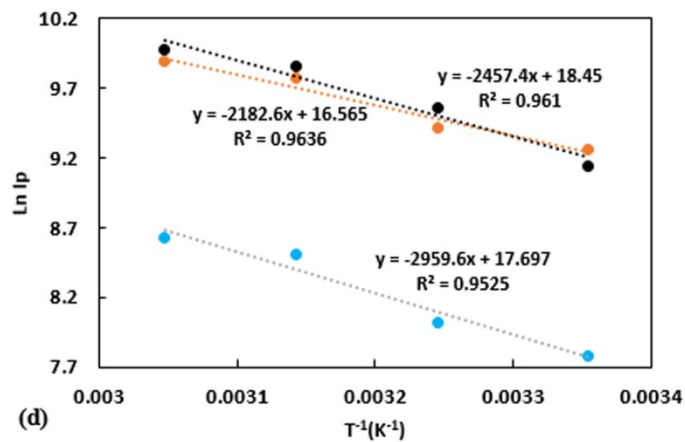

**Figure 3S.** The effect of temperature on cyclic voltammetry curves of (a) Ni<sub>1</sub>Au<sub>3</sub>-NGQD (b) Ni<sub>3</sub>Au<sub>1</sub>-NGQD (c) Ni<sub>1</sub>Au<sub>1</sub>-NGQD electrocatalysts at the scan rate of 100 mVs<sup>-1</sup>; (d)

The plot of Ln I<sub>p</sub> vs. 1/T for three electrocatalysts in NaOH 0.5 M containing ethanol 0.5

M.

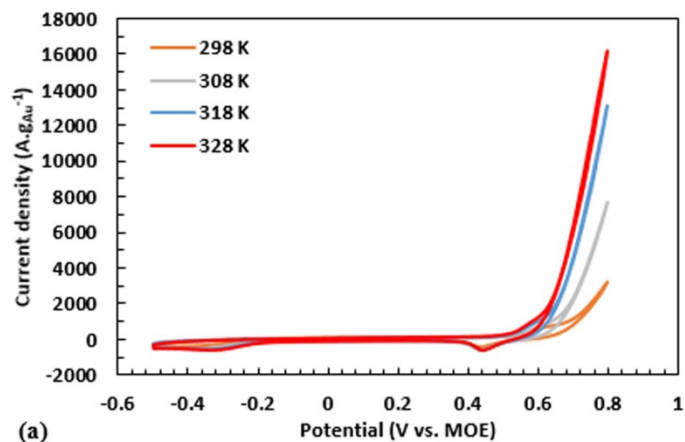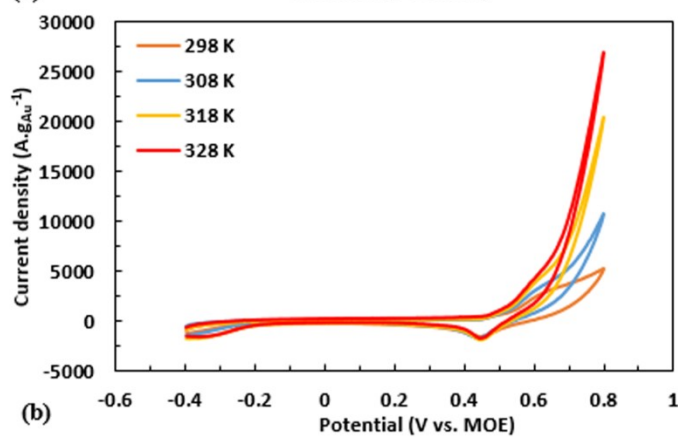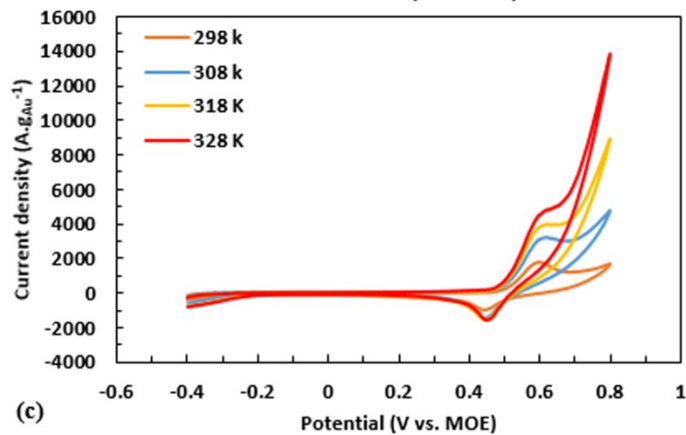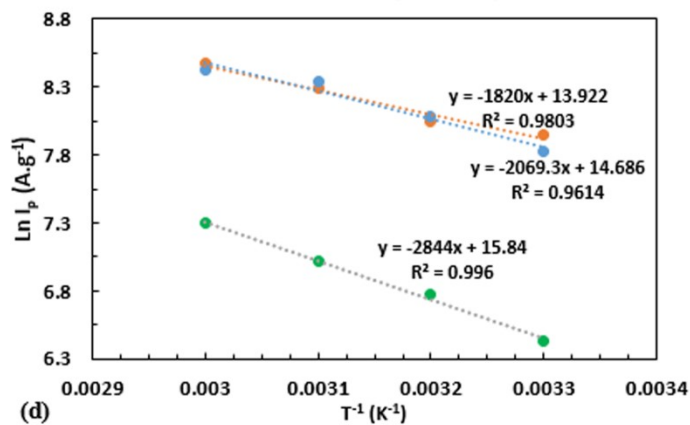

**Figure 4S.** The effect of temperature on cyclic voltammetry curves of (a) Ni<sub>1</sub>Au<sub>3</sub>-NGQD (b) Ni<sub>3</sub>Au<sub>1</sub>-NGQD (c) Ni<sub>1</sub>Au<sub>1</sub>-NGQD electrocatalysts at the scan rate of 100 mVs<sup>-1</sup>; (d)

The plot of Ln I<sub>p</sub> vs. 1/T for three electrocatalysts in NaOH 0.5 M containing formate 0.5

M.

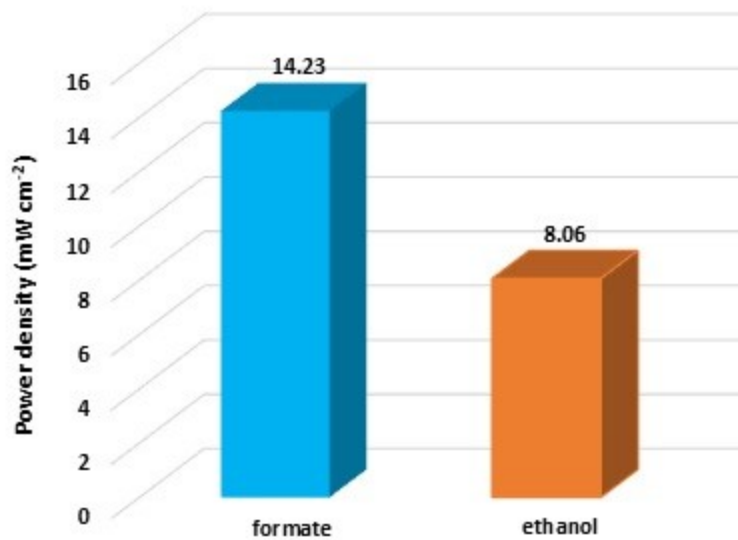

**Figure 5S.** The comparison graph of fuel cell results for Ni<sub>1</sub>Au<sub>1</sub>-NGQDs as anodic electrocatalyst at 60 °C using Pt/C as cathodic electrocatalyst in formate and ethanol fuel cells.
